# Supplementary material
Source: Springer Nature journal article supplement (https://www.springermedizin.de/resource/supplementary/12889_2012_5546_MOESM2_ESM.pdf/9495468)
Supplement: MOESM2 [file 9495468]

**Selection of index components**

Five food groups: FRUIT, VEGGIE, CEREAL, DAIRY, MEAT

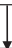

**Partition of each index component**  
into 'Variety' and 'Adequacy' elements

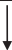

**Designation of index component scoring and cut-offs**

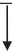

**Aggregation of score for the five index components**  
by multiplying the 'Variety' by 'Adequacy'

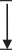

**Calculation of total score**  
ranging from 0 to 100
